# Supplementary material
Source: Springer Nature journal article supplement (https://www.springermedizin.de/resource/supplementary/12992_2012_192_MOESM1_ESM.pdf/9616654)
Supplement: MOESM1 [file 9616654]

Potentially relevant studies identified by searching in PubMed, CHKD and Google scholar databases (n=3769).

2989 articles were excluded because of analysing virological or serological aspects of malaria, dengue and JE, and treatment or vaccination.

Studies selected for more detailed evaluation (abstracts were read) (n=780) and full text articles were retrieved (n=517)

463 studies did not meet inclusion criteria:

- Conducted in China
- Assessed associations between climatic factors and malaria or dengue or JE.
- Only observational study design

Potentially relevant studies (n=54)

After checking reference lists, 3 papers published in Chinese were added.

Studies found potentially relevant (n=57)
